# Supplementary material for: Modeling the response of a control-released ion-selective electrode and employing it for the study of permanganate oxidation kinetics
Source: Royal Society of Chemistry journal article supplement (doi:10.1039/c7ay02735d), 2017-12-26
Supplement: c7ay02735d1.pdf [file c7ay02735d1.pdf]

1

## Supplementary Information

### 2 **Manuscript title:**

3 Modeling the response of control-released ion-selective electrode and employing it for  
4 the study of permanganate oxidation kinetics

5

### 6 **Authors:**

7 Dean Song <sup>a,b</sup>, Rongning Liang <sup>b,\*</sup>, Xiaohua Jiang <sup>b</sup>, Huiqing Sun <sup>a</sup>, Fanyu Kong <sup>a,\*</sup>,  
8 Bo Lv <sup>a</sup>, Qiannan Fang <sup>a</sup>, and Wei Qin <sup>b</sup>

9

10 <sup>a</sup> *The State Agriculture Ministry Laboratory of Quality & Safety Risk Assessment for*  
11 *Tobacco, Tobacco Research Institute, Chinese Academy of Agricultural Sciences,*  
12 *Qingdao 266101, China*

13 <sup>b</sup>*Key Laboratory of Coastal Environmental Processes and Ecological*  
14 *Remediation, Yantai Institute of Coastal Zone Research (YIC), Chinese Academy*  
15 *of Sciences (CAS); Shandong Provincial Key Laboratory of Coastal Zone*  
16 *Environmental Processes, YICCAS, Yantai, Shandong 264003, P. R. China.*

17 \*Email: [rnliang@yic.ac.cn](mailto:rnliang@yic.ac.cn) (R. N. Liang); [kongfanyu@caas.cn](mailto:kongfanyu@caas.cn) (F. Y. Kong)

18

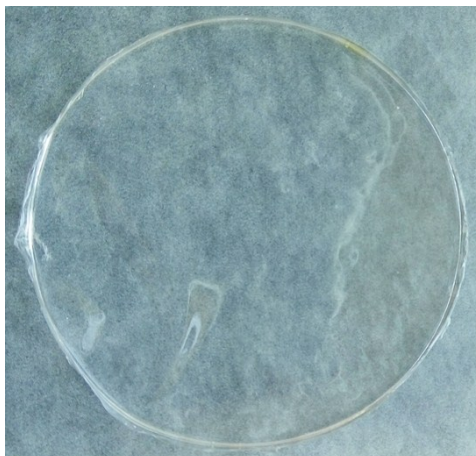

19

20

21 **Fig. S1** A sample photograph of the polymeric membrane obtained in this work.

22 **Table S1** Experimental second-order rate constants ( $k$ ) and computational energy barriers ( $\Delta G^{++}$ ) for the different permanganate oxidation  
 23 reactions in water.

| Bond | Name                          | $T$ (°C) | $k$ ( $M^{-1}s^{-1}$ ) <sup>a</sup> | $k_A$ ( $M^{-1}s^{-1}$ ) <sup>b</sup> | $\ln k_A$ | $\Delta G^{++}$ (kcal mol <sup>-1</sup> ) |
|------|-------------------------------|----------|-------------------------------------|---------------------------------------|-----------|-------------------------------------------|
| C=C  | PCE                           | 25       | $4.58 \times 10^{-2}$               | $4.35 \times 10^{-2}$                 | -3.13     | 32.86                                     |
|      |                               |          | $4.11 \times 10^{-2}$               |                                       |           |                                           |
|      | TCE                           | 25       | $7.80 \times 10^{-1}$               | $6.30 \times 10^{-1}$                 | -0.46     | 29.56                                     |
|      |                               |          | $6.70 \times 10^{-1}$               |                                       |           |                                           |
|      | <i>trans</i> -DCE             | 25       | $4.60 \times 10^{-1}$               | $3.90 \times 10^1$                    | 3.66      | 26.45                                     |
| C-H  | Ethanol                       | 20       | $1.67 \times 10^{-3}$               | $2.85 \times 10^{-3}$ <sup>c</sup>    | -5.86     | 33.08                                     |
|      |                               | 30       | $4.03 \times 10^{-3}$               |                                       |           |                                           |
|      | Toluene                       | 25       | $8.32 \times 10^{-4}$               | $8.32 \times 10^{-4}$                 | -7.09     | 34.23                                     |
| O-H  | H <sub>2</sub> O <sub>2</sub> | 25       | $3.70 \times 10^2$                  | $3.70 \times 10^2$                    | 5.91      | 24.51                                     |

24 <sup>a</sup>  $k$  values were obtained from the reference “R. H. Waldemer and P. G. Tratnyek, *Environ. Sci. Technol.*, 2006, **40**, 1055-1061”.

25 <sup>b</sup>  $k_A$  represents the average  $k$  value at 25 °C

26 <sup>c</sup>  $k_A$  value for ethanol was obtained by averaging the  $k$  values at 20 and 30 °C

27 .

28

29 The following section gives the Cartesian coordinates of optimized structures,  
30 including  $\text{MnO}_4^-$ ,  $\text{H}_2\text{O}_2$ , RC, TS, PC, PC(T); and PCE, TCE, *trans*-DCE, Ethanol,  
31 Toluene with the corresponding transition states  $\text{TS}_{\text{PCE}}$ ,  $\text{TS}_{\text{TCE}}$ ,  $\text{TS}_{\text{trans-DCE}}$ ,  $\text{TS}_{\text{Ethanol}}$ ,  
32  $\text{TS}_{\text{Toluene}}$ .

33

34

| MnO <sub>4</sub> <sup>-</sup> | Cartesian coordinates |           |           |
|-------------------------------|-----------------------|-----------|-----------|
|                               | x                     | y         | z         |
| Mn                            | 0                     | 0         | 0         |
| O                             | 0.921033              | 0.921033  | 0.921033  |
| O                             | -0.921033             | -0.921033 | 0.921033  |
| O                             | -0.921033             | 0.921033  | -0.921033 |
| O                             | 0.921033              | -0.921033 | -0.921033 |

35

| H <sub>2</sub> O <sub>2</sub> | Cartesian coordinates |           |           |
|-------------------------------|-----------------------|-----------|-----------|
|                               | x                     | y         | z         |
| O                             | 0                     | 0.726713  | -0.065629 |
| H                             | 0.752828              | 0.918397  | 0.525032  |
| O                             | 0                     | -0.726713 | -0.065629 |
| H                             | -0.752828             | -0.918397 | 0.525032  |

37

| RC   | Cartesian coordinates |           |           |
|------|-----------------------|-----------|-----------|
| Atom | x                     | y         | z         |
| Mn   | -0.990431             | 0.018519  | 0.001978  |
| O    | -2.107364             | -1.014849 | -0.4616   |
| O    | -0.62249              | -0.239476 | 1.52699   |
| O    | 0.327889              | -0.17669  | -0.899739 |
| O    | -1.534472             | 1.503346  | -0.171643 |
| O    | 2.839471              | -0.727242 | 0.05855   |
| H    | 1.929703              | -0.517307 | -0.276656 |
| O    | 3.510929              | 0.54972   | -0.122803 |
| H    | 3.51937               | 0.895854  | 0.789157  |

38

| TS   | Cartesian coordinates |           |           |
|------|-----------------------|-----------|-----------|
| Atom | x                     | y         | z         |
| Mn   | 0.860233              | 0.041848  | -0.022495 |
| O    | 2.031111              | -1.008108 | -0.19787  |
| O    | -0.245847             | -0.099961 | -1.166713 |
| O    | 1.329217              | 1.542338  | 0.156595  |
| O    | -0.155432             | -0.419452 | 1.28896   |
| O    | -2.222755             | -0.700202 | -0.109    |
| H    | -1.08648              | -0.579165 | 0.827271  |
| O    | -2.898064             | 0.526952  | 0.09648   |
| H    | -3.125193             | 0.800421  | -0.812515 |

40

| PC   | Cartesian coordinates |           |           |
|------|-----------------------|-----------|-----------|
| Atom | x                     | y         | z         |
| Mn   | 0.818982              | 0.069557  | -0.041886 |
| O    | 1.097451              | 1.623104  | -0.139702 |
| O    | 1.889945              | -1.026707 | -0.439156 |
| O    | -0.724669             | -0.290776 | -0.943323 |
| O    | 0.176548              | -0.316505 | 1.601372  |
| H    | -0.746397             | -0.609286 | 1.493962  |
| O    | -1.869674             | -0.693546 | -0.177083 |
| O    | -2.643115             | 0.485538  | 0.129795  |
| H    | -3.140047             | 0.621479  | -0.70201  |

41

| PC(T) | Cartesian coordinates |           |           |
|-------|-----------------------|-----------|-----------|
| Atom  | x                     | y         | z         |
| Mn    | -0.717099             | -0.103718 | 0.038683  |
| O     | -0.49887              | -1.147001 | 1.238449  |
| O     | -1.833688             | -0.557086 | -1.041029 |
| O     | 0.78213               | 0.03396   | -1.008299 |
| O     | -1.035365             | 1.586605  | 0.545731  |
| H     | -0.297989             | 1.925126  | 1.086238  |
| O     | 1.8105                | 0.640141  | -0.238889 |
| O     | 2.649466              | -0.398144 | 0.304335  |
| H     | 3.232075              | -0.599975 | -0.455715 |

43

| PCE  | Cartesian coordinates |           |           |
|------|-----------------------|-----------|-----------|
| Atom | x                     | y         | z         |
| C    | 0                     | 0         | 0.673389  |
| C    | 0                     | 0         | -0.673389 |
| Cl   | 0                     | 1.461128  | -1.603618 |
| Cl   | 0                     | -1.461128 | -1.603618 |
| Cl   | 0                     | -1.461128 | 1.603618  |
| Cl   | 0                     | 1.461128  | 1.603618  |

44

| TS <sub>PCE</sub> | Cartesian coordinates |           |           |
|-------------------|-----------------------|-----------|-----------|
| Atom              | x                     | y         | z         |
| C                 | 1.093204              | -0.697976 | 0.008897  |
| C                 | 1.093202              | 0.697976  | -0.00888  |
| Cl                | 1.439767              | 1.595937  | 1.445544  |
| Cl                | 1.464675              | 1.562951  | -1.477512 |
| Cl                | 1.439893              | -1.595938 | -1.445496 |
| Cl                | 1.464558              | -1.562946 | 1.477562  |
| O                 | -0.964505             | 1.237467  | -0.040481 |
| Mn                | -2.013                | 0         | -0.000031 |
| O                 | -2.881994             | 0.044746  | 1.333689  |
| O                 | -2.882073             | -0.044752 | -1.333699 |
| O                 | -0.964505             | -1.237468 | 0.040366  |

46

| TCE  | Cartesian coordinates |           |   |
|------|-----------------------|-----------|---|
| Atom | x                     | y         | z |
| C    | -1.045831             | -0.391041 | 0 |
| H    | -2.062129             | -0.019232 | 0 |
| C    | 0                     | 0.441219  | 0 |
| Cl   | -0.257319             | 2.164845  | 0 |
| Cl   | 1.657233              | -0.062624 | 0 |
| Cl   | -0.909496             | -2.1188   | 0 |

47

| TS <sub>TCE</sub> | Cartesian coordinates |           |           |
|-------------------|-----------------------|-----------|-----------|
| Atom              | x                     | y         | z         |
| C                 | -1.075301             | 0.618275  | -0.942409 |
| H                 | -1.007267             | 0.453931  | -2.007194 |
| C                 | -1.330149             | -0.435214 | -0.087824 |
| Cl                | -1.452645             | -2.028745 | -0.805275 |
| Cl                | -2.161364             | -0.246748 | 1.429816  |
| Cl                | -1.441713             | 2.259891  | -0.500814 |
| O                 | 1.026331              | 0.780694  | -1.049634 |
| Mn                | 1.827322              | -0.02436  | 0.116885  |
| O                 | 2.821337              | -1.094122 | -0.520789 |
| O                 | 2.530662              | 0.997123  | 1.118353  |
| O                 | 0.584691              | -0.768451 | 0.847458  |



49

| <i>trans</i> -DCE | Cartesian coordinates |           |           |
|-------------------|-----------------------|-----------|-----------|
| Atom              | x                     | y         | z         |
| C                 | 0                     | 0.66612   | 0.968443  |
| H                 | 0                     | 1.220914  | 1.899558  |
| C                 | 0                     | -0.66612  | 0.968443  |
| H                 | 0                     | -1.220914 | 1.899558  |
| Cl                | 0                     | -1.668376 | -0.453542 |
| Cl                | 0                     | 1.668376  | -0.453542 |

50

| TS <sub><i>trans</i>-DCE</sub> | Cartesian coordinates |           |           |
|--------------------------------|-----------------------|-----------|-----------|
| Atom                           | x                     | y         | z         |
| C                              | -1.300865             | 0.687634  | -0.869109 |
| H                              | -1.087778             | 1.223632  | -1.78292  |
| C                              | -1.300865             | -0.687635 | -0.869108 |
| H                              | -1.087777             | -1.223634 | -1.782918 |
| Cl                             | -2.164902             | -1.63644  | 0.312839  |
| Cl                             | -2.164899             | 1.636441  | 0.312839  |
| O                              | 0.66725               | -1.246713 | -0.282988 |
| Mn                             | 1.650805              | 0         | 0.074771  |
| O                              | 2.001709              | 0.000004  | 1.632072  |
| O                              | 2.929092              | -0.000005 | -0.879922 |
| O                              | 0.667253              | 1.246714  | -0.282995 |

| Ethanol | Cartesian coordinates |           |           |
|---------|-----------------------|-----------|-----------|
| Atom    | x                     | y         | z         |
| O       | 1.247729              | -0.257846 | -0.112281 |
| C       | 0.074461              | 0.558862  | 0.047635  |
| C       | -1.219107             | -0.244333 | -0.02115  |
| H       | 0.133933              | 1.114263  | 0.994191  |
| H       | 0.122343              | 1.284734  | -0.769594 |
| H       | -2.08497              | 0.423778  | 0.067645  |
| H       | -1.294107             | -0.782448 | -0.973082 |
| H       | -1.274167             | -0.975268 | 0.795626  |
| H       | 1.283012              | -0.889464 | 0.624551  |

| TS <sub>Ethanol</sub> | Cartesian coordinates |           |           |
|-----------------------|-----------------------|-----------|-----------|
| Atom                  | x                     | y         | z         |
| O                     | -2.595042             | -1.310033 | -0.002355 |
| C                     | -2.17817              | -0.051784 | 0.385237  |
| C                     | -2.941595             | 1.12524   | -0.18118  |
| H                     | -2.042531             | -0.046247 | 1.458859  |
| H                     | -0.957681             | 0.147063  | -0.32382  |
| H                     | -2.479838             | 2.063795  | 0.141105  |
| H                     | -2.966893             | 1.111456  | -1.277313 |
| H                     | -3.978112             | 1.106461  | 0.188985  |
| H                     | -2.830851             | -1.31008  | -0.947276 |
| Mn                    | 1.25352               | 0.015371  | -0.015241 |
| O                     | -0.060946             | 0.271886  | -1.050187 |
| O                     | 0.312054              | -0.209306 | 1.307876  |
| O                     | 2.033037              | -1.325188 | -0.396127 |
| O                     | 2.14046               | 1.335457  | 0.130312  |

| Toluene | Cartesian coordinates |           |           |
|---------|-----------------------|-----------|-----------|
| Atom    | x                     | y         | z         |
| C       | 0.917023              | 0.000008  | -0.012143 |
| C       | 0.195387              | 1.204567  | -0.009372 |
| C       | 0.195397              | -1.204563 | -0.009373 |
| C       | 2.429493              | 0.000005  | 0.009524  |
| C       | -1.203421             | 1.207763  | 0.002156  |
| C       | -1.203406             | -1.20777  | 0.002157  |
| C       | -1.909469             | -0.000005 | 0.008795  |
| H       | 0.734527              | 2.149894  | -0.018253 |
| H       | 0.734546              | -2.149885 | -0.018254 |
| H       | 2.836936              | -0.887296 | -0.487235 |
| H       | 2.836921              | 0.887821  | -0.486319 |
| H       | 2.80882               | -0.000536 | 1.040461  |
| H       | -1.740641             | 2.153207  | 0.00217   |
| H       | -1.74062              | -2.153218 | 0.002171  |
| H       | -2.996515             | -0.000013 | 0.014798  |

| TS <sub>Toluene</sub> | Cartesian coordinates |           |           |
|-----------------------|-----------------------|-----------|-----------|
|                       | x                     | y         | z         |
| C                     | 1.922673              | -0.012462 | 0.653572  |
| C                     | 2.550234              | 1.208608  | 0.304103  |
| C                     | 2.560886              | -1.218783 | 0.273495  |
| C                     | 0.651325              | -0.026464 | 1.36171   |
| C                     | 3.767069              | 1.220726  | -0.374948 |
| C                     | 3.777885              | -1.20317  | -0.405139 |
| C                     | 4.388019              | 0.015833  | -0.733795 |
| H                     | 2.073313              | 2.146263  | 0.580451  |
| H                     | 2.092184              | -2.167266 | 0.525959  |
| H                     | 0.38641               | -0.945646 | 1.87747   |
| H                     | 0.378887              | 0.87822   | 1.897922  |
| H                     | -0.227764             | -0.027902 | 0.160707  |
| H                     | 4.236018              | 2.168945  | -0.62532  |
| H                     | 4.255248              | -2.140628 | -0.679001 |
| H                     | 5.336801              | 0.026711  | -1.263471 |
| Mn                    | -2.460574             | 0.003546  | -0.18555  |
| O                     | -2.04994              | 0.015395  | 1.389173  |
| O                     | -0.868021             | -0.030401 | -0.764194 |
| O                     | -3.234258             | -1.337582 | -0.566257 |
| O                     | -3.188444             | 1.360955  | -0.597466 |
